# Supplementary material for: The stability of magnetic chitosan beads in the adsorption of Cu2+
Source: Royal Society of Chemistry journal article supplement (doi:10.1039/c5ra20943a), 2015-12-08
Supplement: c5ra20943a1.pdf [file c5ra20943a1.pdf]

## Supplementary Materials:

### The stability of magnetic chitosan beads for adsorption of Cu<sup>2+</sup>

#### 1 Kinetic, isothermal and thermodynamic studies

##### 1.1 Kinetic studies

To explore the mechanism of sorption and potential rate-controlling step, the experimental data were analyzed according to the linearized form of pseudo-first-order and the pseudo-second-order kinetics models. The pseudo-first-order equation could be expressed as Eq. (S1).

$$\log(Q_e - Q_t) = \log Q_e - \frac{k_1}{2.303} t \quad (\text{S1})$$

Where  $Q_e$  (mg g<sup>-1</sup>) is the equilibrium capacity and  $Q_t$  (mg g<sup>-1</sup>) is the adsorption capacity at time  $t$  (min);  $t$  (min) is the sorption time;  $k_1$  (min<sup>-1</sup>) is the rate constants of pseudo-first order. The values of  $\log(Q_e - Q_t)$  were calculated from the kinetic data

The pseudo-second-order equation could be expressed as Eq.(S2).

$$\frac{t}{Q_t} = \frac{1}{k_2 Q_e^2} + \frac{t}{Q_e} \quad (\text{S2})$$

Where  $k_2$  (g mg<sup>-1</sup> min<sup>-1</sup>) are the rate constants of pseudo-second order adsorption, respectively. The kinetic adsorption data were fitted to Eqs. (S1) and (S2), and the calculated results were given in **Table S1**.

**Table S1**

The pseudo-first order and pseudo-second order adsorption constants, calculated and experimental  $Q_e$  value for different initial Cu<sup>2+</sup> concentrations.

| Parameter                                                              | $Q_e$ (mg g <sup>-1</sup> ) | Pseudo-first order         |                                   |         | Pseudo-second order            |                                   |        |
|------------------------------------------------------------------------|-----------------------------|----------------------------|-----------------------------------|---------|--------------------------------|-----------------------------------|--------|
|                                                                        |                             | $K_1$ (min <sup>-1</sup> ) | $Q_{e,cal}$ (mg g <sup>-1</sup> ) | $R^2$   | $K_2$ (mg g <sup>-1</sup> min) | $Q_{e,cal}$ (mg g <sup>-1</sup> ) | $R^2$  |
| Initial Cu <sup>2+</sup> concentration (mg/g) $t=150$ min, pH 4, 30 °C |                             |                            |                                   |         |                                |                                   |        |
| 100                                                                    | 64.5                        | $2.7682 \times 10^{-2}$    | 25.06                             | 0.9532  | $4.9064 \times 10^{-3}$        | 65.79                             | 0.9999 |
| 210                                                                    | 90                          | $3.9381 \times 10^{-2}$    | 64.53                             | 0.93502 | $1.7809 \times 10^{-3}$        | 92.59                             | 0.9996 |
| 513                                                                    | 148                         | $4.1454 \times 10^{-2}$    | 172.98                            | 0.9558  | $0.4708 \times 10^{-3}$        | 156.25                            | 0.9998 |
| 750                                                                    | 163                         | $4.6060 \times 10^{-2}$    | 179.06                            | 0.9549  | $0.6096 \times 10^{-3}$        | 169.49                            | 0.9993 |

## 1.2 Isothermal studies

The adsorption equilibrium data was fitted to Langmuir and Freundlich isotherm models.

The equations were expressed as follows:

Langmuir equation:

$$\frac{C_e}{Q_e} = \frac{C_e}{Q_m} + \frac{1}{Q_m K_L} \quad (S3)$$

Where  $K_L$  is the Langmuir constant ( $L\ mg^{-1}$ ),  $Q_m$  is the maximum sorption capacity ( $mg\ g^{-1}$ ),  $C_e$  is the equilibrium  $Cu^{2+}$  concentration ( $mg\ L^{-1}$ ) in aqueous solution.

Freundlich equation:

$$\log Q_e = b_F \log C_e + \log K_F \quad (S4)$$

Where  $K_F$  ( $mg\ g^{-1}$ ) and  $b_F$  are the empirical constants, they indicate the relative sorption capacity and sorption intensity, respectively.

**Table S2**

Adsorption equilibrium isotherm

| Freundlich             |         |         | Langmuir               |                       |        |
|------------------------|---------|---------|------------------------|-----------------------|--------|
| $K_F$ ( $mg\ g^{-1}$ ) | $b_F$   | $R^2$   | $Q_m$ ( $mg\ g^{-1}$ ) | $K_L$ ( $L\ g^{-1}$ ) | $R^2$  |
| 15.9038                | 0.36698 | 0.09050 | 167.22                 | 0.0271                | 0.9935 |

## 1.3 Thermodynamic studies

In order to obtain the thermodynamics involved in the adsorption of  $Cu^{2+}$  by MCBs, the experiments were performed at temperatures of 293, 303, 313 K, and the initial  $Cu^{2+}$  concentration of 20-750  $mg\ L^{-1}$ .

Thermodynamic parameters can be calculated from the variation of the thermodynamic equilibrium constant  $K_0$  with the change in temperature. For adsorption reactions,  $K_0$  is defined as follows:

$$K_0 = \frac{a_s}{a_e} = \frac{v_s C_s}{v_e C_e} \quad (S5)$$

Where  $a_s$  is the activity of adsorbed  $Cu^{2+}$ ,  $a_e$  is the activity of  $Cu^{2+}$  in solution at equilibrium,  $v_s$  and  $v_e$  are the activity coefficients of adsorbed  $Cu^{2+}$  and  $Cu^{2+}$  in solution at equilibrium, respectively,  $C_s$  is the amount of  $Cu^{2+}$  absorbed by MCBs ( $mmol\ g^{-1}$ ), and  $C_e$  is the concentration

of  $\text{Cu}^{2+}$  in solution at equilibrium ( $\text{mmol mL}^{-1}$ ). Values of  $K_0$  can be obtained by plotting  $\ln(C_s/C_e)$  versus  $C_s$  and extrapolating to  $C_s=0$  (**Fig. 5(C)**). The straight line obtained is fitted to the points based on a least-squares analysis. Its intercept with the vertical axis gives the values of  $K_0$  <sup>S1-S3</sup>.

According to the isothermal equation (Eq. (S6)) and the Van't Hoff equation (Eq. (S7)) as follows:

$$\Delta G^0 = -RT \ln K_0 \quad (\text{S6})$$

$$\ln K_0 = \frac{\Delta H^0}{RT} + \frac{\Delta S^0}{R} \quad (\text{S7})$$

Where  $R$  is the gas constant ( $8.314 \text{ J mol}^{-1} \text{ K}^{-1}$ ), and  $T$  is the absolute temperature in Kelvin.  $\Delta H^0$  is standard enthalpy change ( $\text{kJ mol}^{-1}$ ) and  $\Delta S^0$  is standard entropy change ( $\text{J mol}^{-1} \text{ K}^{-1}$ ).

**Table S3**

Thermodynamic parameters for adsorption of  $\text{Cu}^{2+}$  on MCBs

| $T$ (K) | $K_0$ | $\Delta G^0$ ( $\text{kJ mol}^{-1}$ ) | $\Delta H^0$ ( $\text{kJ mol}^{-1}$ ) | $\Delta S^0$ $\text{J mol}^{-1} \text{ K}^{-1}$ |
|---------|-------|---------------------------------------|---------------------------------------|-------------------------------------------------|
| 293     | 2.603 | -5.620                                |                                       |                                                 |
| 303     | 2.513 | -6.331                                | -4.579                                | 76.027                                          |
| 313     | 2.307 | -6.774                                |                                       |                                                 |

## 2 Characterization of MCBs in various conditions

### 2.1 FTIR and XRD analysis of MCBs in the regeneration process

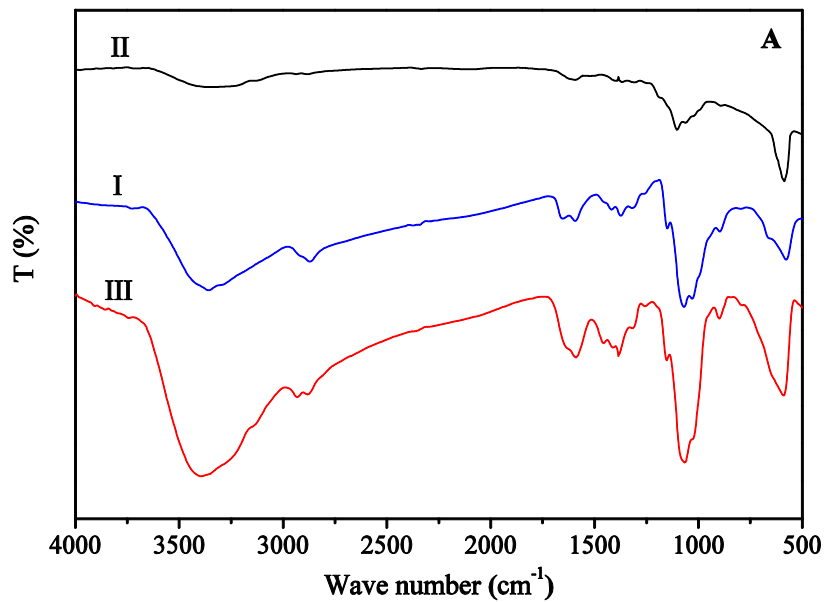

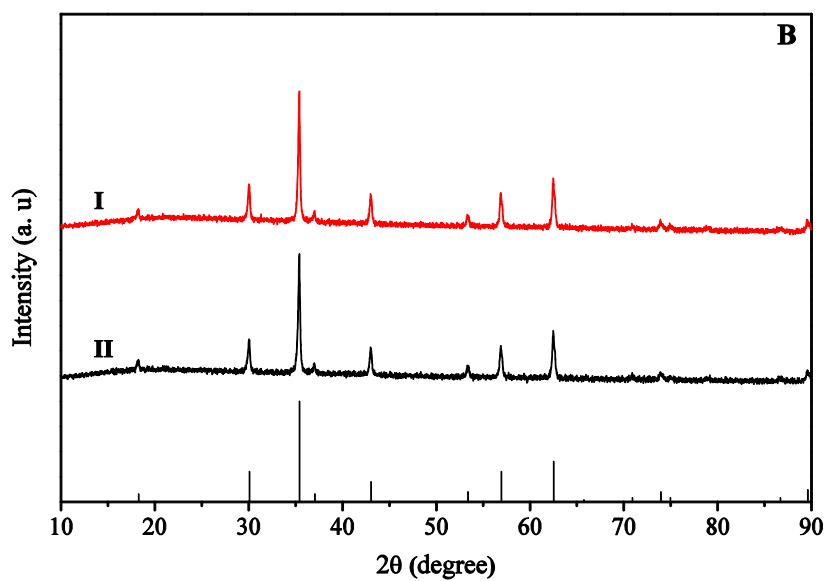

**Fig. S1.** (A) FTIR spectra of original MCBs(I), Cu<sup>2+</sup> loaded MCBs(II), and MCBs after desorption (III). (B) XRD patterns of MCBs adsorbed Cu<sup>2+</sup>(I) and regenerated(II). (Literature values for the peak positions and intensities for bulk magnetite samples are indicated by the vertical bars).

## 2.2 FTIR and XRD analysis of MCBs stored for ten months

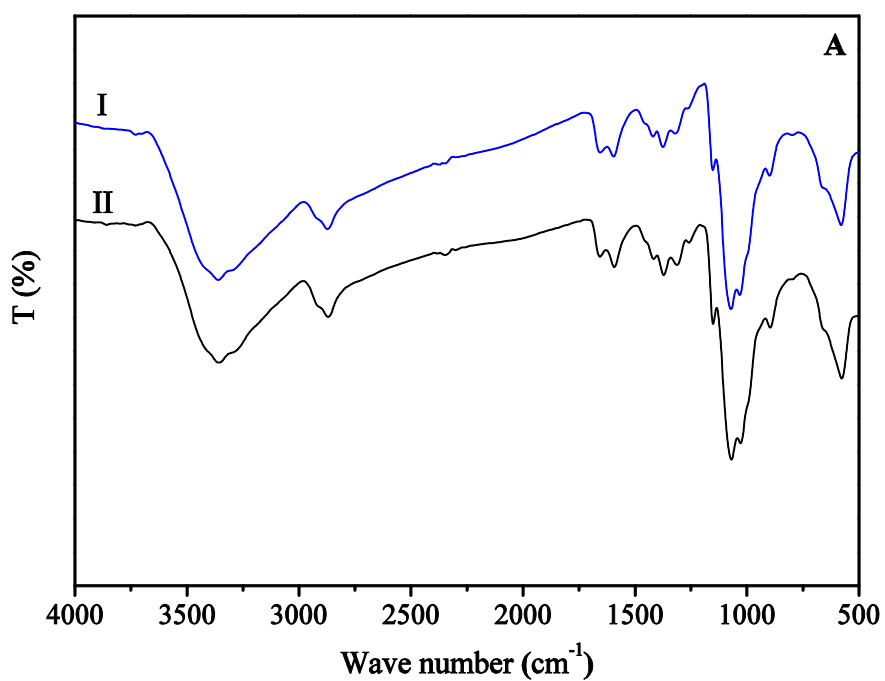

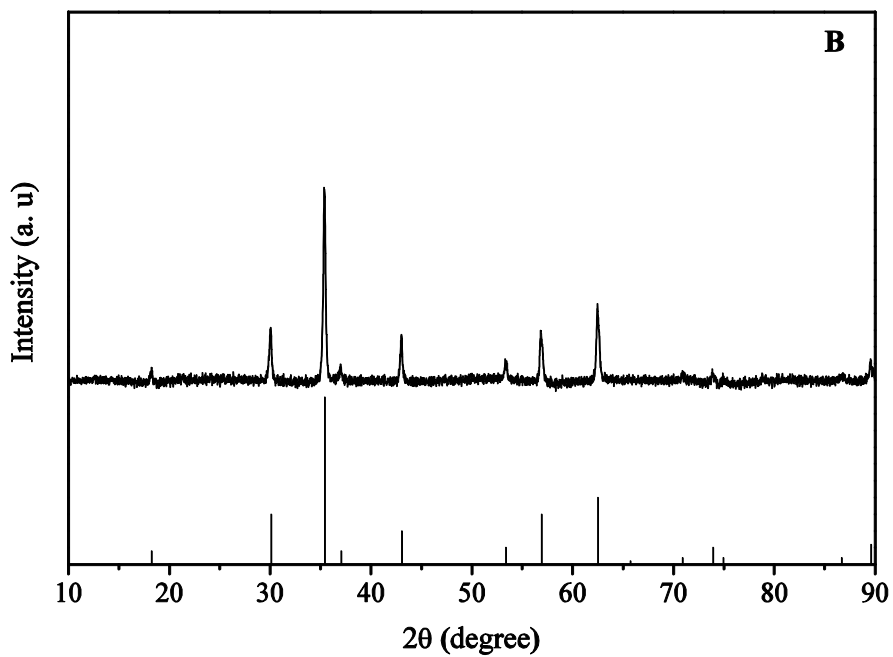

**Fig. S2 (A)** FTIR spectra of original MCBs(I) and MCBs stored for ten months(II). **(B)** XRD of MCBs stored for ten months. (Literature values for the peak positions and intensities for bulk magnetite samples are indicated by the vertical bars)

### 2.3 FTIR and XRD analysis of MCBs heated under atmosphere and vacuum

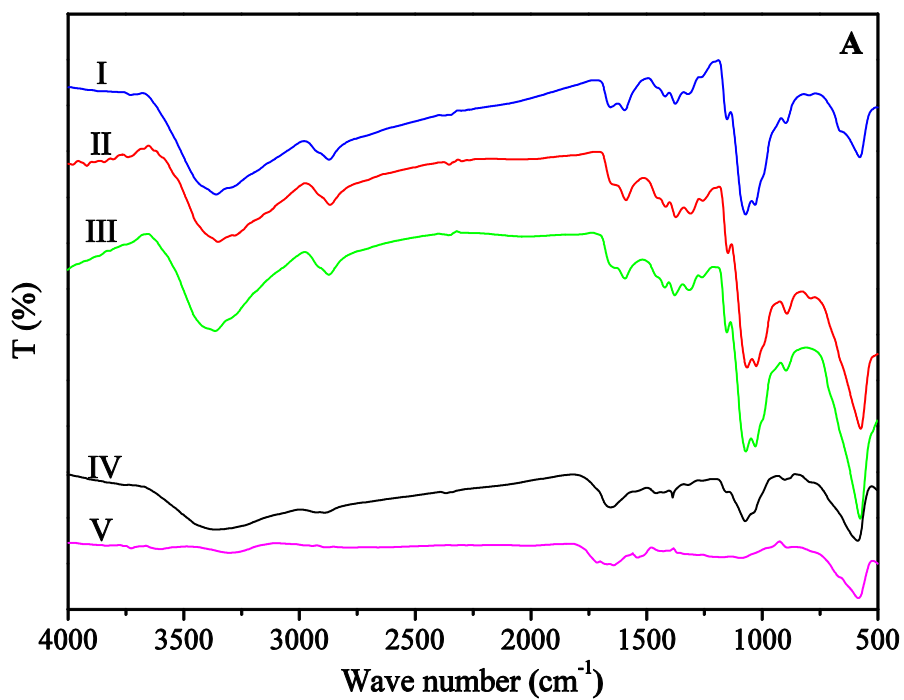

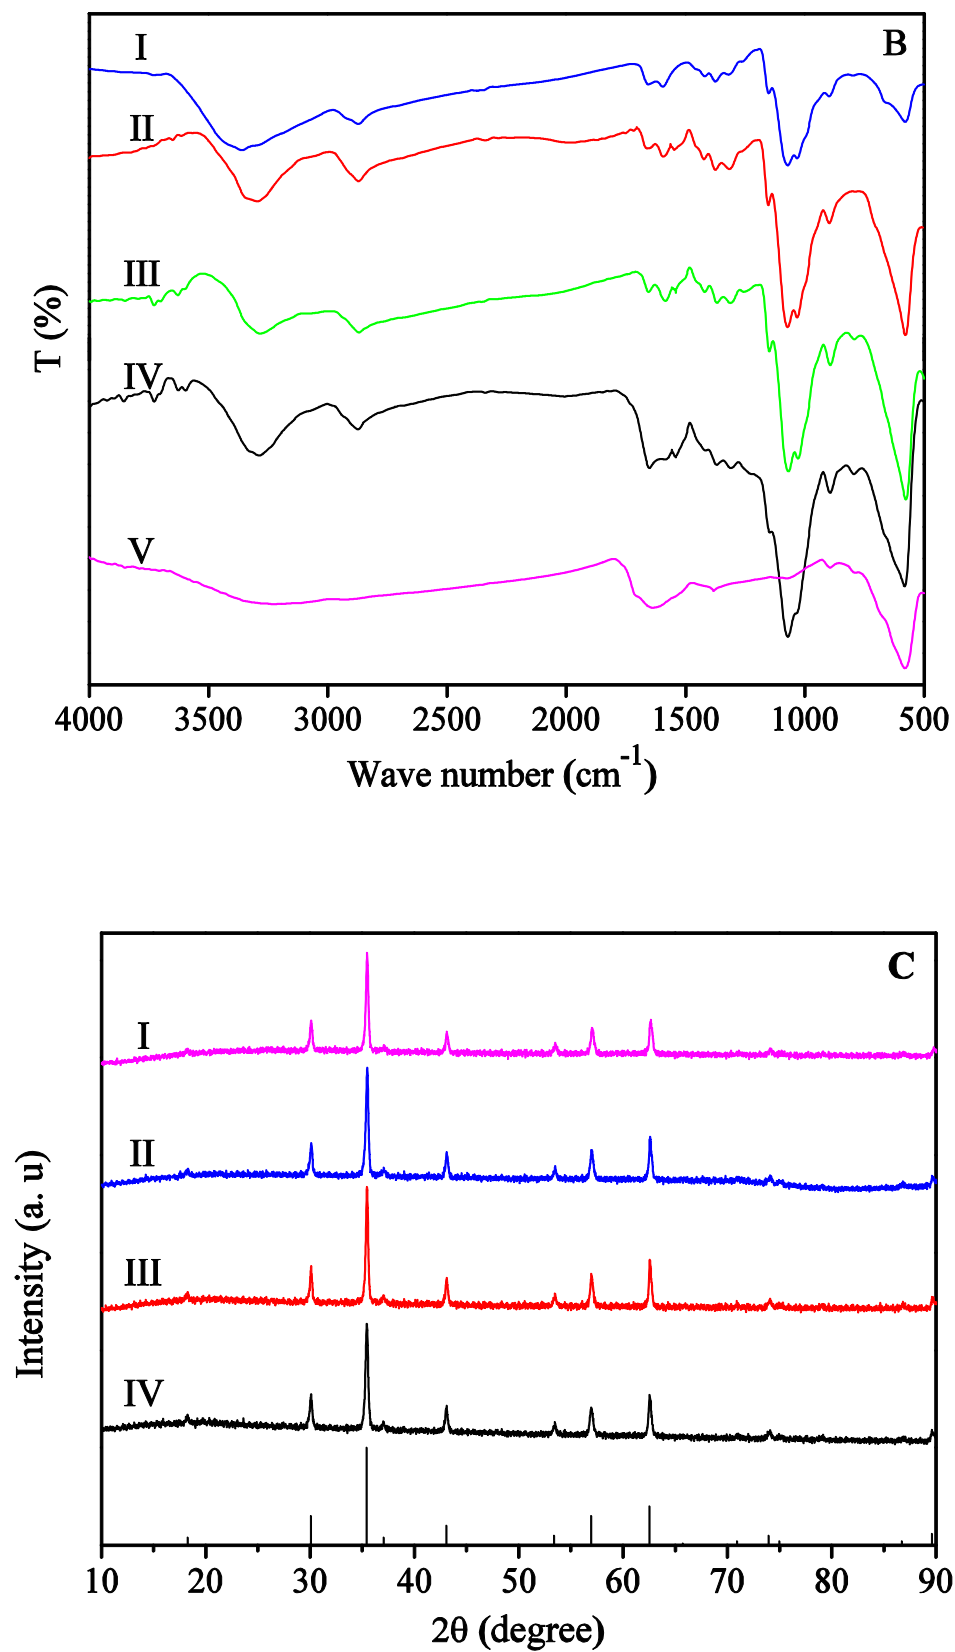

**Fig. S3.** FTIR spectra of MCBs heated under atmosphere(A) and vacuum(B) with different temperature for 30 h: original MCBs (I), 50 °C (II), 100 °C (III), 150 °C(IV), 200 °C (V). (C) XRD of MCBs heated in air blast oven (150 °C (I) and 200 °C (II)) and vacuum oven (150 °C (III) and 200 °C (IV)). (Literature values for the peak

positions and intensities for bulk magnetite samples are indicated by the vertical bars)

#### 2.4 FTIR and XRD analysis of MCBs stored at different magnetic fields

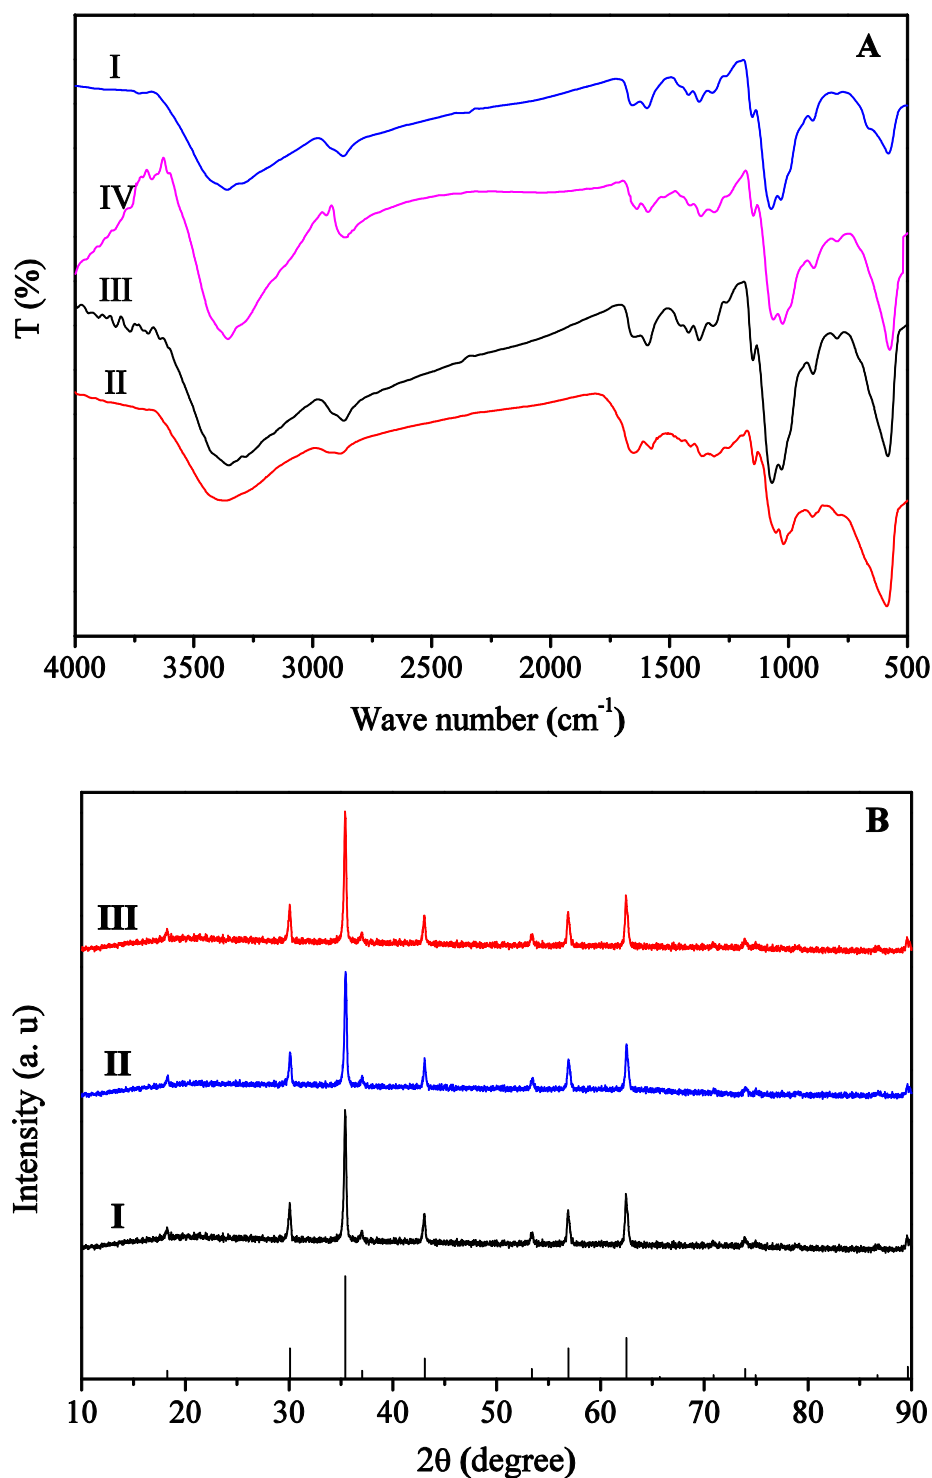

**Fig. S4** (A) FTIR spectra of MCBs stored at different magnetic fields original MCBs(I), 0.2 T(II), 0.3 T(III) and 0.4 T (IV). (B) XRD of MCBs stored at different magnetic fields (0.2 T(I), 0.3T (II) and 0.4 T(III)). (Literature values for the peak positions and intensities for bulk magnetite samples are indicated by the vertical bars).

**Supplementary Material references**

- S1. D. Singh, Adsorpt Sci Technol, 2000,18, 741-748.
- S2. J.W. Biggar, M.W. Cheung, Soil Sci. Soc. Am., Proc, 1973, 37, 863-868.
- S3. Y.H. Li, Z. Di, J. Ding, D. Wu, Z. Luan, Y. Zhu, Water Res, 39 (2005) 605–609.
